# Supplementary material for: Allergen presensitization drives an eosinophil-dependent arrest in lung-specific helminth development
Source: JCI journal article supplement (doi:10.1172/jci127963), 2019-08-04
Supplement: sd1 [file 1]

## Supplemental figures

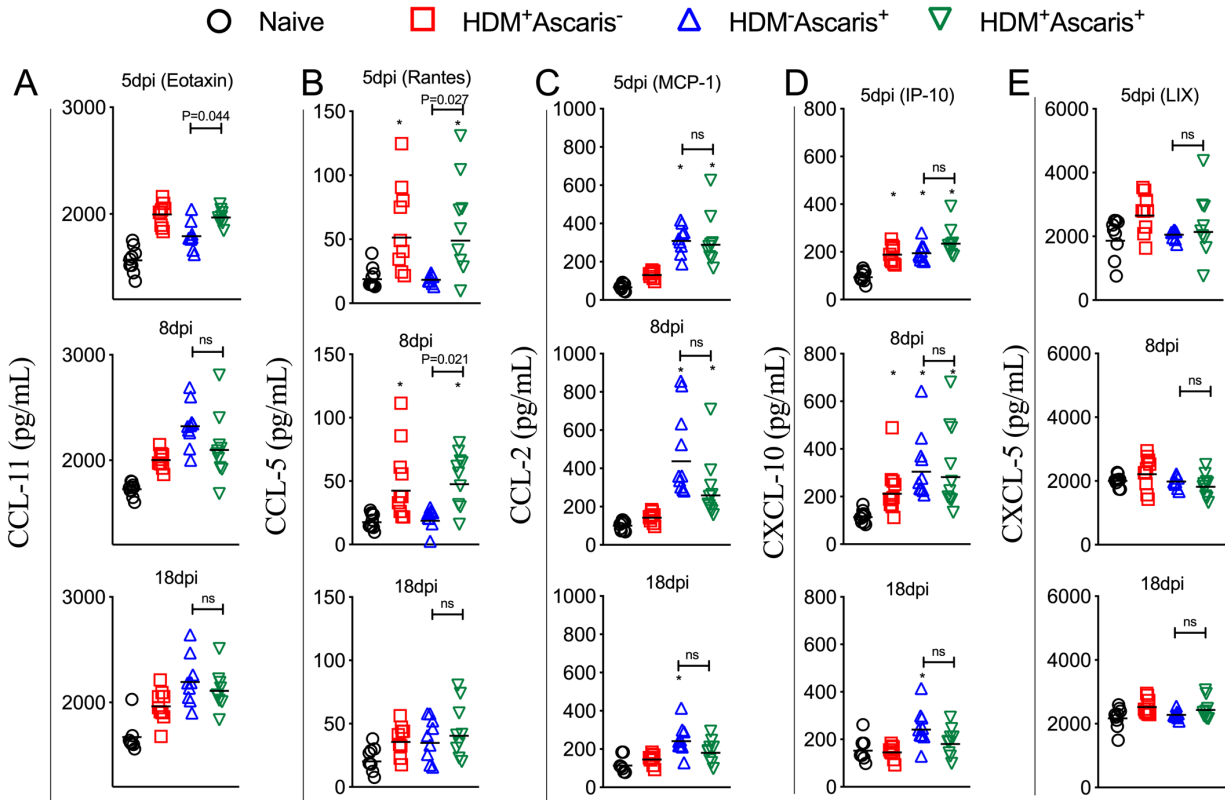

**Figure S1: Allergic sensitization followed by *Ascaris* infection drives a marked influx of inflammatory cells to the lungs elicited by a robust increase of chemokines.** Luminex analysis for quantification of the chemokines CCL-11 (A), CCL-5 (B), CCL-2 (C), CXCL-10 (D), CXCL-5 (E) in the lung homogenates of HDM<sup>-</sup>Ascaris<sup>-</sup> (○), HDM<sup>+</sup>Ascaris<sup>-</sup> (□), HDM<sup>-</sup>Ascaris<sup>+</sup> (△) and HDM<sup>+</sup>Ascaris<sup>+</sup> (▽) Balb/c mice at different time points, at day 5 (n=9 mice/group), day 8 (n=10 mice/group) and day 18 (n=10 mice/group). Each symbol represents a single mouse and the horizontal bars are the geometric means. P values are indicated in each graph. Statistical differences were considered when  $P < 0.05$  by the Kruskal-Wallis test followed by the Dunn's Multiple Comparison Test and were used for all comparisons, with focus to the differences between HDM<sup>-</sup>Ascaris<sup>+</sup> and HDM<sup>+</sup>Ascaris<sup>+</sup>; \* means significantly different ( $p < 0.05$ ) from naïve (HDM<sup>-</sup>Ascaris<sup>-</sup>) group.

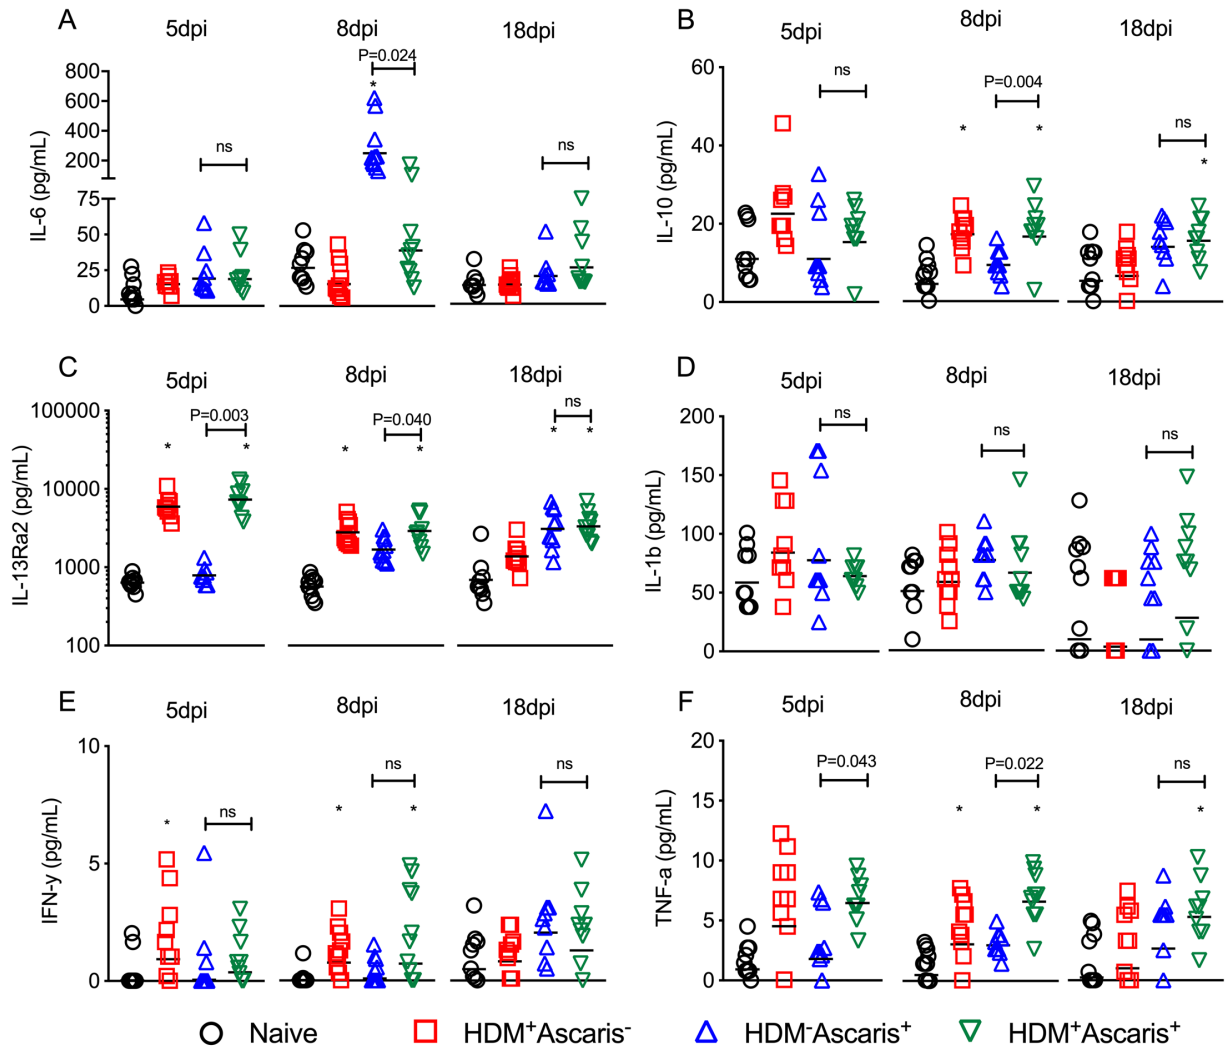

**Figure S2: The profile of cytokines and cytokines receptors in pre-allergic animals followed or not by *Ascaris* infection.** Levels of IL-6(A), IL-10(B), IL-13Ra2(C), IL-1b(D), TNF-a(E) and IFN- $\gamma$ (F) in the lung homogenates of HDM<sup>-</sup>*Ascaris*<sup>-</sup> (O), HDM<sup>+</sup>*Ascaris*<sup>-</sup> (□), HDM<sup>-</sup>*Ascaris*<sup>+</sup> (Δ) and HDM<sup>+</sup>*Ascaris*<sup>+</sup> (▽) Balb/c mice at different time points: at day 5 (n=9 mice/group), day 8 (n=10 mice/group) and day 18 (n=10 mice/group). Each symbol represents a single mouse and the horizontal bars are the geometric means. P values are indicated in each graph. Statistical differences were considered when P<0.05 by the Kruskal-Wallis test followed by the Dunn's Multiple Comparison Test and were used for all comparisons, with focus to the differences between HDM<sup>-</sup>*Ascaris*<sup>+</sup> and HDM<sup>+</sup>*Ascaris*<sup>+</sup>; \* means significantly different (p<0.05) from naïve (HDM<sup>-</sup>*Ascaris*<sup>-</sup>) group.

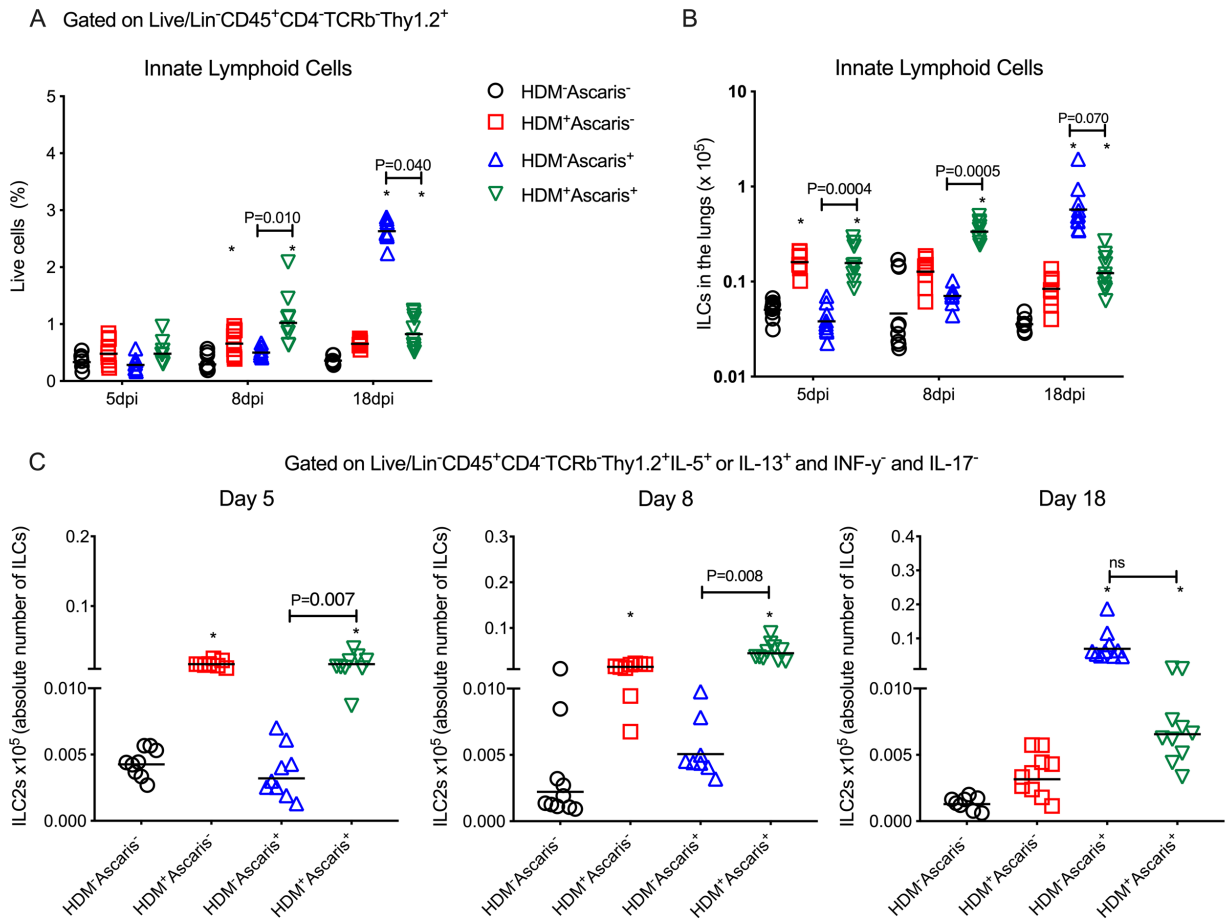

**FigureS3: Innate lymphoid cells type 2 in the lungs of in pre-allergic animals followed or not by *Ascaris* infection at different time points.** Frequency (A) and absolute numbers (B) of total innate lymphoid cells (ILCs) gated as CD45<sup>+</sup>Lin<sup>-</sup>CD4<sup>+</sup>TCRb<sup>-</sup>Thy1.2<sup>+</sup>, as well as, the absolute numbers of ILC2s subsets, based on the expression of the signature cytokines IL-5 or IL-13, after PMA/Ionomycin stimulation, in the different groups at day 5 (n=9 mice/group), day 8 (n=10 mice/group) and day 18 (n=10 mice/group).(C). Each symbol represents a single mouse and the horizontal bars are the GMs. Net frequency of ILC2s cells was calculated by subtracting the baseline frequency (non-stimulated) from the frequency following stimulation with PMA/ionomycin. P values are indicated in each graph. Statistical differences were considered when P<0.05 by the Kruskal-Wallis test followed by the Dunn's Multiple Comparison Test and were used for all comparisons, with focus to the differences between HDM<sup>-</sup>Ascaris<sup>+</sup> and HDM<sup>+</sup>Ascaris<sup>+</sup>.; \* means significantly different (p<0.05) from naïve (HDM<sup>-</sup>Ascaris<sup>-</sup>) group.

A

Whole peripheral blood - Gated on Live TCR-β<sup>+</sup> cells

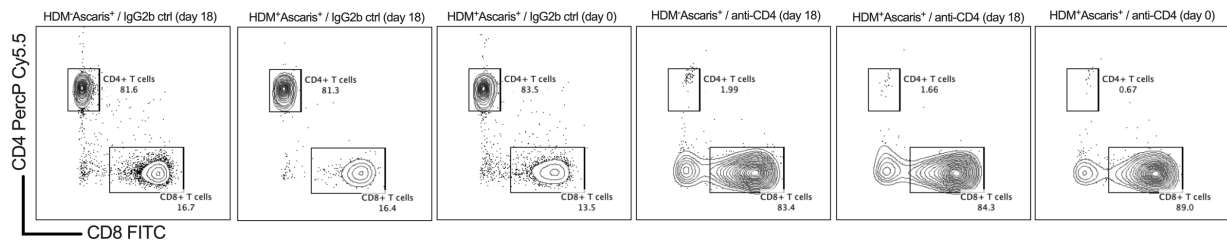

B

Lung tissue - Gated on Live TCR-β<sup>+</sup> cells

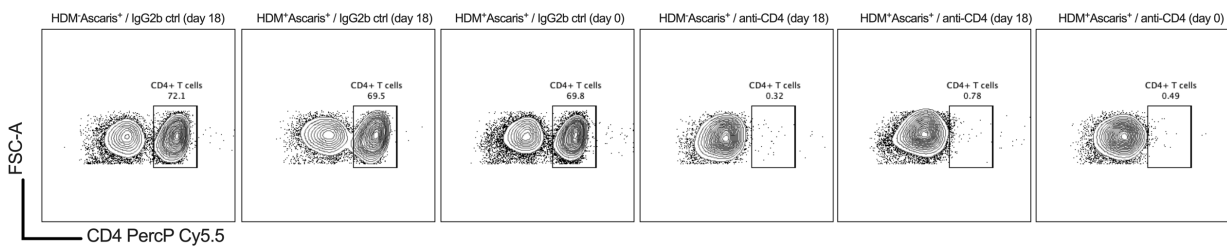

C

Lung tissue - Gated on Live<sup>+</sup>Lin<sup>-</sup>Ly6G<sup>-</sup>

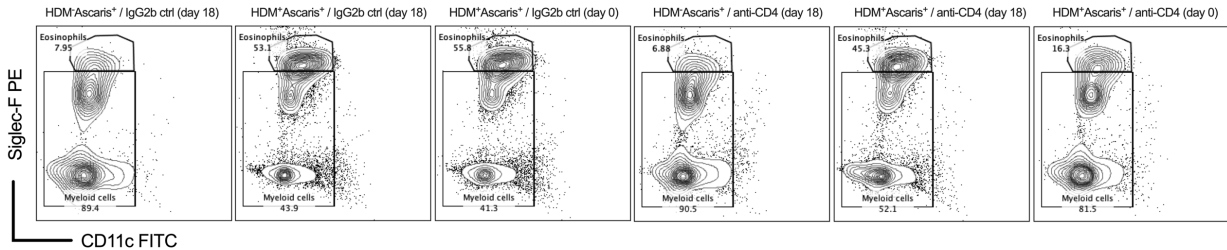

**Figure S4: Depletion check for CD4 T cells.** (A) Representative flow cytometry dot plots showing the frequency of CD4 and CD8 cells gated on TCR-β<sup>+</sup> lymphocytes in the whole blood of HDM<sup>-</sup>Ascaris<sup>+</sup> (n=6) and HDM<sup>+</sup>Ascaris<sup>+</sup> (n=6) mice treated with isotype control IgG2b or anti-CD4. (B) Representative flow cytometry dot plots on frequency of CD4 cells gated on TCR-β<sup>+</sup> lymphocytes in the lung tissue of HDM<sup>-</sup>Ascaris<sup>+</sup> (n=6) and HDM<sup>+</sup>Ascaris<sup>+</sup> (n=6) mice, treated with isotype control IgG2b or anti-CD4. (C) Representative flow cytometry dot plots on the frequency of eosinophils in the lung tissue of HDM<sup>-</sup>Ascaris<sup>+</sup> (n=6) and HDM<sup>+</sup>Ascaris<sup>+</sup> (n=6) mice, treated with isotype control IgG2b or anti-CD4.
